# Supplementary material for: SOD3 Suppresses the Expression of MMP-1 and Increases the Integrity of Extracellular Matrix in Fibroblasts
Source: MDPI journal article supplement (doi:10.3390/antiox11050928), 2022-05-09
Supplement: s1 [file s1]

# **SOD3 Suppresses the Expression of MMP-1 and Increases the Integrity of Extracellular Matrix in Fibroblasts**

**Jin Hyung Kim <sup>1,†</sup>, Hae Dong Jeong <sup>1,†</sup>, Min Ji Song <sup>2</sup>, Dong Hun Lee <sup>2,3,4</sup>, Jin Ho Chung <sup>2,3,4,5</sup> and Seung-Taek Lee <sup>1,\*</sup>**

<sup>1</sup> Department of Biochemistry, College of Life Science and Biotechnology, Yonsei University, Seoul 03722, Republic of Korea; qnt1313@yonsei.ac.kr (J.H.K.); ihaedong7@yonsei.ac.kr (H.D.J.)

<sup>2</sup> Department of Dermatology, Seoul National University College of Medicine, Seoul 03080, Republic of Korea; minjisong@snu.ac.kr (M.J.S.); ivymed27@snu.ac.kr (D.H.L.); jhchung@snu.ac.kr (J.H.C.)

<sup>3</sup> Laboratory of Cutaneous Aging Research, Biomedical Research Institute, Seoul National University Hospital, Seoul 03080, Republic of Korea

<sup>4</sup> Institute of Human-Environment Interface Biology, Seoul National University, Seoul 03080, Republic of Korea

<sup>5</sup> Institute on Aging, Seoul National University, Seoul 03080, Republic of Korea

\* Correspondence: stlee@yonsei.ac.kr; Tel.: +82-2-2123-2703

† These authors contributed equally to this work.

**Table S1.** Primer sequences used for reverse transcription-polymerase chain reaction of mouse (m) *Sod* mRNAs and human (h) *COL1A1*, *COL1A2*, *MMP1*, and *GAPDH* mRNAs.

| Gene<br>Symbol  | Nucleotide Sequence                | Nucleotide<br>Position | Annealing<br>Temp.<br>(°C) | GenBank #   |
|-----------------|------------------------------------|------------------------|----------------------------|-------------|
| m <i>SOD1</i>   | 5'- CAAGATGACTTGGGCAAAGGTGG -3'    | 466–488                | 55                         | NM_011434.2 |
|                 | 5'- ACTGCGCAATCCCAATCACTCC -3'     | 559–538                |                            |             |
| m <i>SOD2</i>   | 5'- CCTCACTCACGGCCACATTG -3'       | 879–898                | 60                         | NM_013671.3 |
|                 | 5'- ACAGCACCCCAGTCATAGTGC -3'      | 963–943                |                            |             |
| m <i>SOD2</i>   | 5'- CCAGGACACCTTAGTTAACCCAG -3'    | 1260–1282              | 65                         | NM_011435.3 |
|                 | 5'- GGGGTTCTCTGAGAGCAGACTC -3'     | 1411–1390              |                            |             |
| h <i>COL1A1</i> | 5'- ACAGCGTCACTGTCGATGGCTG -3'     | 4341–4372              | 55                         | NM_000088   |
|                 | 5'- GGAGGGAGTTTACAGGAAGCAGACAG -3' | 4522–4497              |                            |             |
| h <i>COL1A2</i> | 5'- GAGGGCAACAGCAGGTTCACTTACAC -3' | 4044–4069              | 55                         | NM_000089   |
|                 | 5'-GTCAGCACCAACCGATGTCCAA AG -3'   | 4196–4174              |                            |             |
| h <i>MMP1</i>   | 5'- GTACTGATATAATTTAGTTC -3'       | 1656–1675              | 45                         | NM_002421   |
|                 | 5'- GTTATCCCTTGCCTATCTAG -3'       | 1908–1889              |                            |             |
| h <i>GAPDH</i>  | 5'- ACTGCTTAGCACCCCTGGCCA -3'      | 488–508                | 55                         | BC023632    |
|                 | 5'- TTGGCAGTGGGGACACGGAAG -3'      | 740–720                |                            |             |

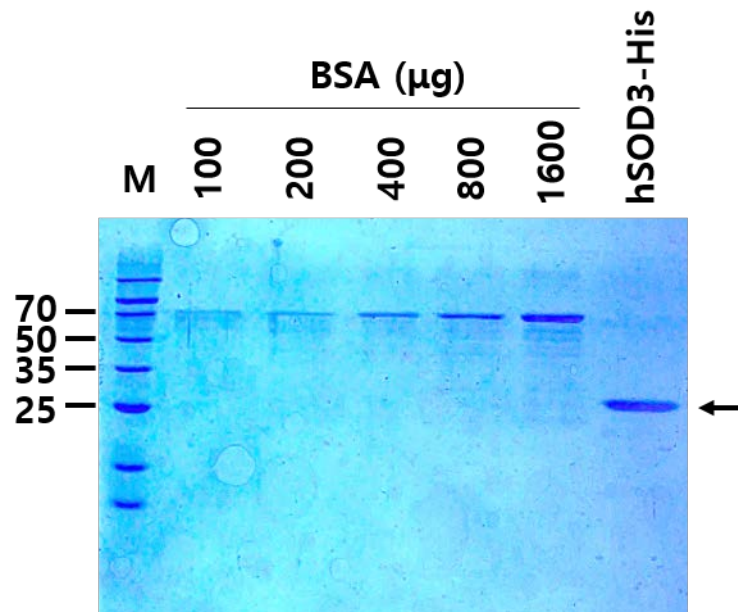

**Figure S1. Purification of recombinant human SOD3-His.**

Recombinant human (h) SOD3-His polypeptide was purified from the conditioned medium of HEK293 cells stably transfected with pcDNA3.1-hSOD3-His. The figure shows purified hSOD3-His polypeptide resolved by SDS-PAGE and stained with Coomassie brilliant blue. Various amounts of bovine serum albumin (BSA) were loaded to estimate the concentration of hSOD3-His polypeptide. Migration of molecular weight markers (M) is shown in the left lane of the gel.

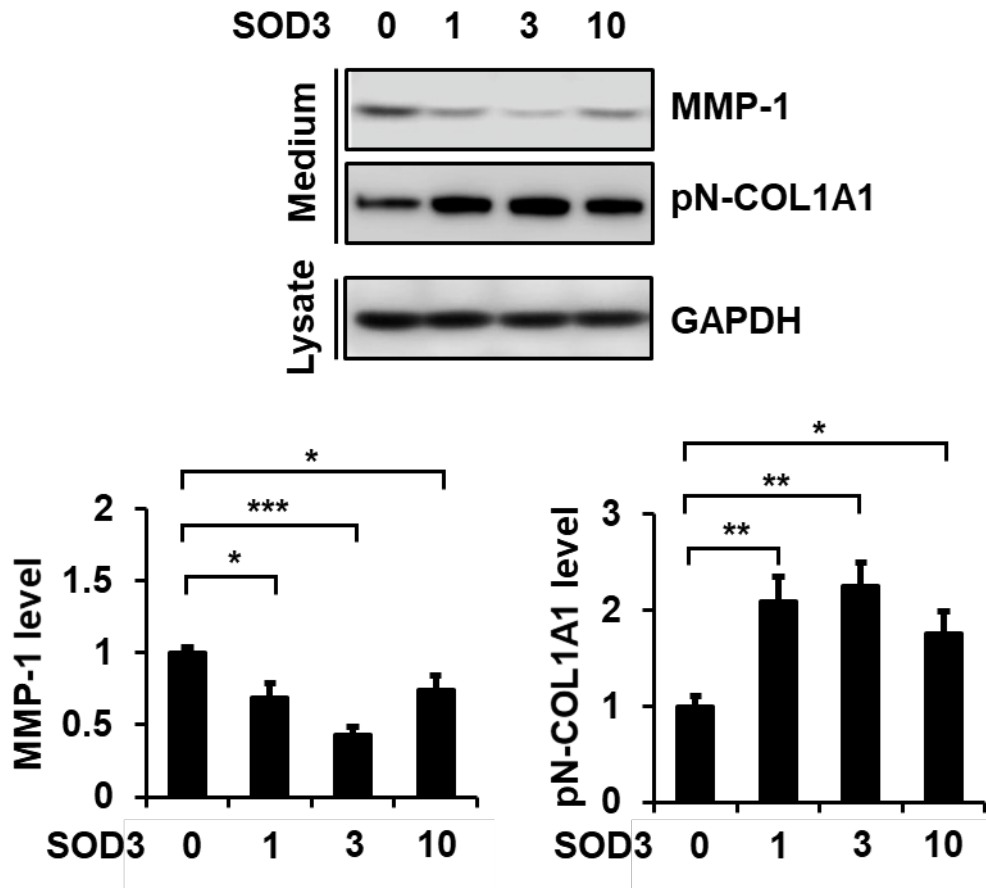

**Figure S2. Titration of the optimal SOD3 concentration to decrease MMP-1 secretion and increase type I collagen secretion in fibroblasts.**

Human foreskin fibroblasts were incubated in a serum-free medium in the presence of 0, 1, 3, and 10  $\mu\text{g/ml}$  human SOD3-His for 24 h. The secreted levels of MMP-1 and type I collagen in conditioned media were assessed by western blot analysis using antibodies against MMP-1 and pN-COL1A1, respectively. The GAPDH level in cell lysates was monitored as a loading control. Graphs show levels of MMP-1 and type I collagen relative to the level in non-treated cells, which was quantified by image J software. Each value is the mean  $\pm$  standard deviations of three independent experiments. \*p < 0.05, \*\*p < 0.01, and \*\*\*p < 0.001 vs. control.
